# Supplementary material for: A Redox Regulatory System Critical for Mycobacterial Survival in Macrophages and Biofilm Development
Source: PubMed Central journal article supplement (PMC4401782; doi:10.1371/journal.ppat.1004839), 2015-04-17

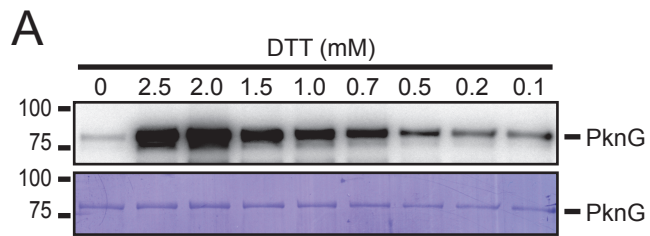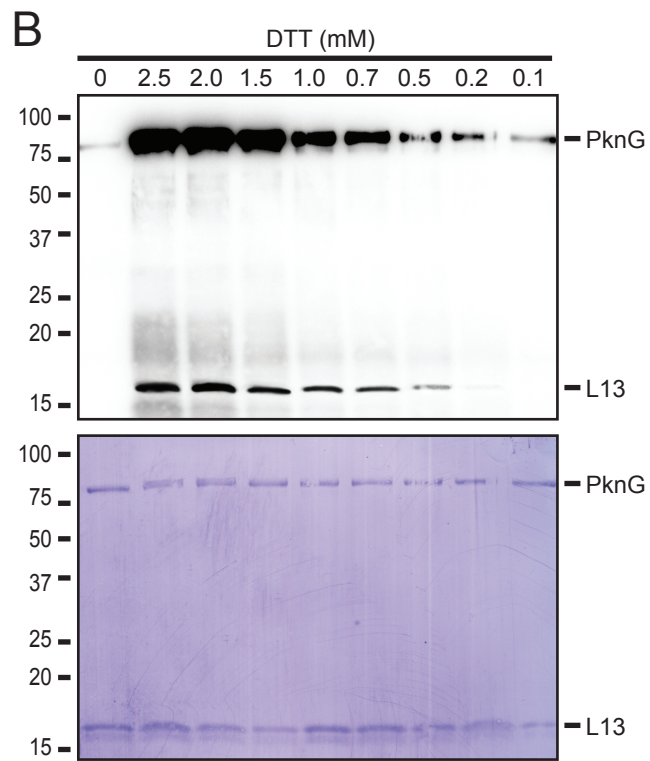

Supplement: ppat.1004839.s003.pdf [file ppat.1004839.s003.pdf]
